# Supplementary material
Source: PubMed Central journal article supplement (PMC3503183)
Supplement: 1210754109_pnas.201210754SI.pdf [file 1210754109_pnas.201210754SI.pdf]

# Supporting Information

Stec 10.1073/pnas.1210754109

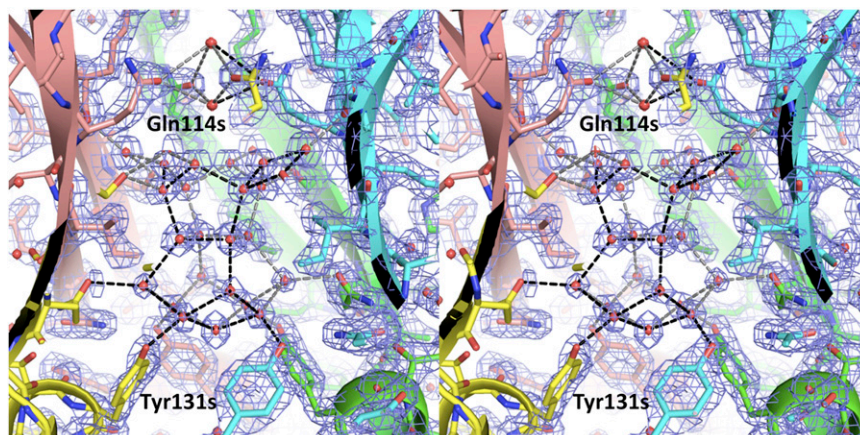

**Fig. S1.** The stereo representation of the eight-stranded  $\beta$ -barrel formed around the fourfold symmetry axis by the small subunits (marked in blue, green, beige, and yellow). In the center there is a water cluster forming an extensive clathrate around hydrophobic residues and anchored by the polar residues. One quarter of the network is connected by black dashed lines, and the rest of the network is in gray dashed lines. The barrel is reminiscent of an ion channel with two specificity filters formed by Tyr131 and Gln114 of the small subunit. The placement of the water molecules and the quality of the electron density provide support for the high quality of the data and the resulting models.



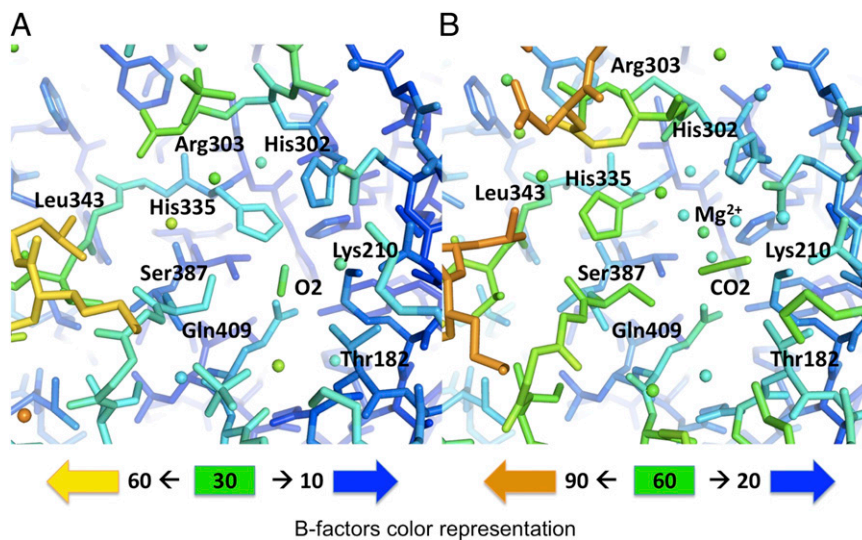

**Fig. 53.** The temperature factor representation of the active site. Blue represents low-temperature factors, and yellow represents high-temperature factors. (A) Model of the apo-enzyme structure (O<sub>2</sub> bound, B ~ 30 Å<sup>2</sup>). (B) Model of the activation complex with Mg<sup>2+</sup> and CO<sub>2</sub> bound, (B ~ 60 Å<sup>2</sup>). Both models show large temperature-factor (mobility) gradients. The gaseous ligands show intermediate mobility fully comparable with the surrounding protein and solvent atoms. The model of the activation complex with Mg<sup>2+</sup> and CO<sub>2</sub> bound shows higher temperature factors at the active site, which underscores the transient nature of the complex (despite the data having been collected on frozen crystals at 100 K).

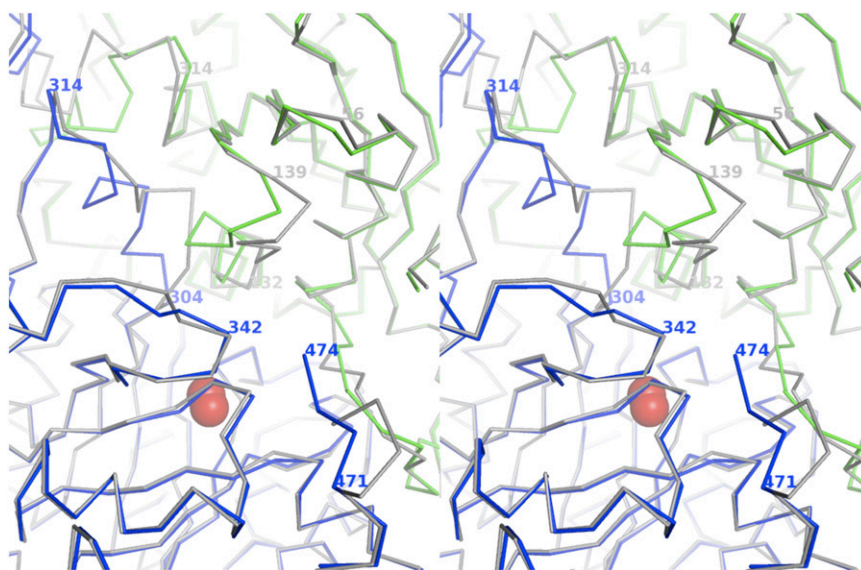

**Fig. 54.** The stereo representation of the  $\alpha$ -carbon models of both superposed structures illustrates extensive conformational changes around both active sites. Blue and green represent the dimer of apo structure (O<sub>2</sub> bound), and gray represents both subunits of the activation complex with Mg<sup>2+</sup> and CO<sub>2</sub> bound. The red spheres represent dioxygen bound at the active site.

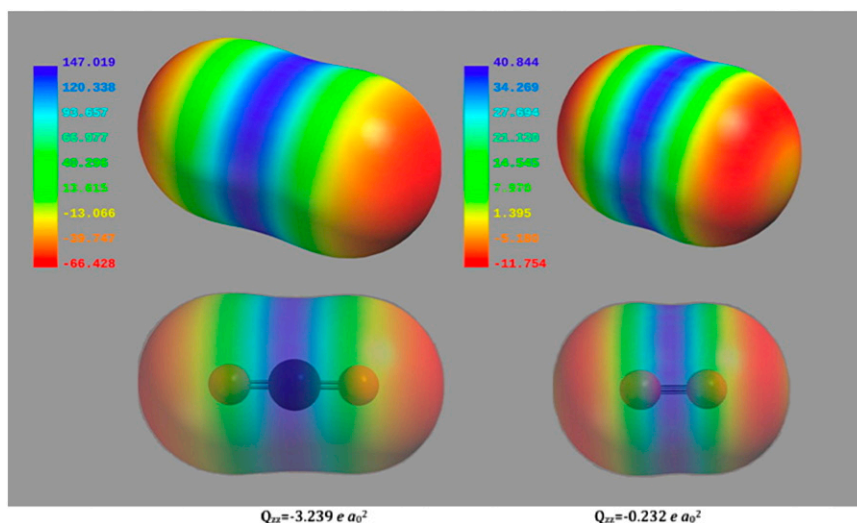

**Fig. S5.** The quadrupole moment of gaseous ligands is visualized by showing the molecular surface with mapped electrostatic potential. The color scheme follows commonly accepted conventions: blue, positive; red, negative. The properties of both small molecules were calculated and visualized in Spartan: (Left) CO<sub>2</sub>. (Right) O<sub>2</sub>. The values of the Q<sub>zz</sub> component of the quadrupole moment are listed with CO<sub>2</sub> having 15 times larger moment than O<sub>2</sub>.

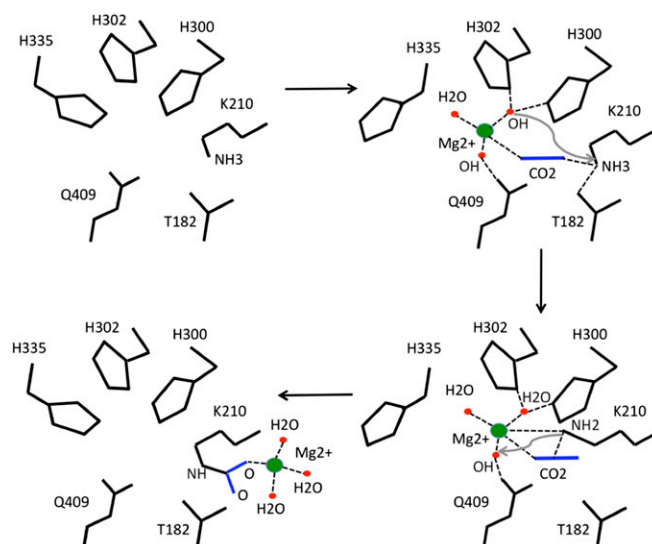

**Fig. S6.** Schematic of the activation reaction of RuBisCO. In step 1 (Upper Left), His-335 swings out to an alternative conformational state. In step 2 (Upper Right), a Mg<sup>2+</sup> ion surrounded by two OH and a water molecule binds to the active site. In step 3 (Lower Right), after CO<sub>2</sub> binding to the metal ion, the N<sub>ε</sub> terminal atom of Lys210 swings in and positions close to the carbon and the metal ion. The transformation is aided by the proton transfer to one of the OH groups. In step 3, the second OH deprotonates the N<sub>ε</sub> atom that facilitates the nucleophilic attack of N<sub>ε</sub> on C of CO<sub>2</sub>. In step 4 (Lower Left), Lys210 is carbamylated, and the Mg<sup>2+</sup> is destabilized by a protonation of both OH groups to the H<sub>2</sub>O, which leads to change of metal cation preference from tetrahedral to octahedral conformation and acquisition of a formal negative charge by the carbamyl group. Finally, the metal ion leaves an initial position driven by a conformational change in the carbamyl group of Lys210 to assume coordination with two additional carboxyl groups of Glu213 and Asp212, thus completing the activation step. Stage I has been based on our structure 4F0H and others (for example, 1IWA); stage II is based on our structure of the activation complex with Mg<sup>2+</sup> and CO<sub>2</sub> (4F0K); stage III does not have any direct representation, but it was inferred from the carbonic anhydrase structure 2VVA where the amino group of the Lys210 is replaced by the activated water molecule bound to Mg<sup>2+</sup>; stage IV, which represents the fully activated enzyme, has numerous analogs in other species, for example, 1AUS.

**Table S1. Data collection and refinement statistics for the three models described**

| Parameter/data set                  | Apo + O <sub>2</sub>  | Pre-activation + CO <sub>2</sub> | Activation + H <sub>2</sub> O |
|-------------------------------------|-----------------------|----------------------------------|-------------------------------|
| Space group                         | I422                  | I422                             | I422                          |
| Unit cell parameters                |                       |                                  |                               |
| <i>a</i> (Å)                        | 136.44                | 136.14                           | 136.32                        |
| <i>b</i> (Å)                        | 136.44                | 136.14                           | 136.32                        |
| <i>c</i> (Å)                        | 121.67                | 121.29                           | 121.52                        |
| Data collection                     |                       |                                  |                               |
| Resolution (Å) (last shell)         | 50.0–1.96 (2.01–1.96) | 50.0–2.05 (2.10–2.05)            | 50.0–2.25 (2.30–2.25)         |
| I/s(I) (last shell)                 | 25.4 (4.6)            | 17.4 (1.6)                       | 12.1 (1.3)                    |
| Completeness (%) (last shell)       | 95.2 (98.5)           | 97.9 (80.8)                      | 98.9 (91.8)                   |
| Rsym (last shell)                   | 0.046 (0.33)          | 0.114 (0.611)                    | 0.101 (0.751)                 |
| Refinement                          |                       |                                  |                               |
| Resolution (Å)                      | 40.0–1.96             | 40.0–2.05                        | 40.0–2.25                     |
| No. of reflections                  | 37,497                | 33,570                           | 25,853                        |
| R-factor                            | 0.166                 | 0.181                            | 0.163                         |
| Rfree                               | 0.222                 | 0.241                            | 0.234                         |
| Protein B (Å <sup>2</sup> )         | 20.4                  | 34.0                             | 35.3                          |
| Water molecules                     | 334                   | 407                              | 353                           |
| Water molecules B (Å <sup>2</sup> ) | 23.4                  | 43.1                             | 37.8                          |
| Ligands                             | O <sub>2</sub>        | Mg, CO <sub>2</sub>              | Mg, H <sub>2</sub> O          |
| Ligands B (Å <sup>2</sup> )         | 32.2                  | 57.8                             | 45.8                          |
| Other ligand                        | PO4                   | Glycerol, Cl                     | Glycerol, Cl                  |
| Other ligand B (Å <sup>2</sup> )    | 34.8                  | 52.7                             | 50.5                          |
| rms deviation from ideal            |                       |                                  |                               |
| Bond lengths (Å)                    | 0.021                 | 0.021                            | 0.019                         |
| Bond angles (°)                     | 1.906                 | 1.849                            | 1.774                         |
| Chiral angles (°)                   | 0.133                 | 0.115                            | 0.114                         |
| PDB ID code                         | 4F0H                  | 4F0K                             | 4F0M                          |
